# Supplementary material
Source: PubMed Central journal article supplement (PMC4724626)
Supplement: mmc1.pdf [file mmc1.pdf]

## Supporting Information

### Unzipping of A-Form DNA-RNA, A-Form DNA-PNA, and B-Form DNA-DNA in the $\alpha$ -Hemolysin Nanopore

Rukshan T. Perera,<sup>1</sup> Aaron M. Fleming,<sup>1</sup> Amberlyn M. Peterson,<sup>1</sup> Jennifer M. Heemstra,<sup>1</sup> Cynthia J. Burrows,<sup>1,\*</sup> and Henry S. White<sup>1,\*</sup>

<sup>1</sup>Department of Chemistry, University of Utah, Salt Lake City, Utah

\*To whom correspondence should be addressed.

E-mail: [burrows@chem.utah.edu](mailto:burrows@chem.utah.edu) or [white@chem.utah.edu](mailto:white@chem.utah.edu)

#### Contents

|                                                                                      |     |
|--------------------------------------------------------------------------------------|-----|
| 1. Sample <i>i-t</i> trace of a mixture containing B-form duplex. ....               | S2  |
| 2. Sample <i>i-t</i> trace of a mixture containing A-form duplex. ....               | S3  |
| 3. Sample <i>i-t</i> trace of a mixture containing both A- and B-form.....           | S4  |
| 4. Voltage dependence of unzipping times for DNA-RNA and DNA-DNA duplexes.....       | S5  |
| 5. Unzipping of DNA-RNA duplex with 40-nt overhang.....                              | S6  |
| 6. Thermal melting analysis of A-and B-form duplexes.....                            | S7  |
| 7. Continuous <i>i-t</i> trace of DNA-RNA duplex with 10-nt overhang at 160 mV.....  | S8  |
| 8. Voltage dependent trapping time of the DNA-RNA duplex with 10-nt overhang. ....   | S9  |
| 9. Sample <i>i-t</i> trace of DNA-DNA duplex with 10-nt overhang at 160 mV. ....     | S10 |
| 10. Sample <i>i-t</i> trace of DNA-RNA duplex with no overhang.....                  | S11 |
| 11. Sample <i>i-t</i> trace of DNA-DNA duplex with no overhang.....                  | S12 |
| 12. Sample <i>i-t</i> trace of DNA-DNA duplex with no overhang at 200 mV.....        | S13 |
| 13. Sample <i>i-t</i> trace of a mixture containing DNA-PNA duplex. ....             | S14 |
| 14. Unzipping time and voltage dependent unzipping for DNA-PNA duplexes. ....        | S15 |
| 15. Comparison of unzipping times of DNA-RNA duplexes with 3' and 5' overhangs. .... | S16 |

### 1. Sample $i-t$ trace of a mixture containing B-form duplex.

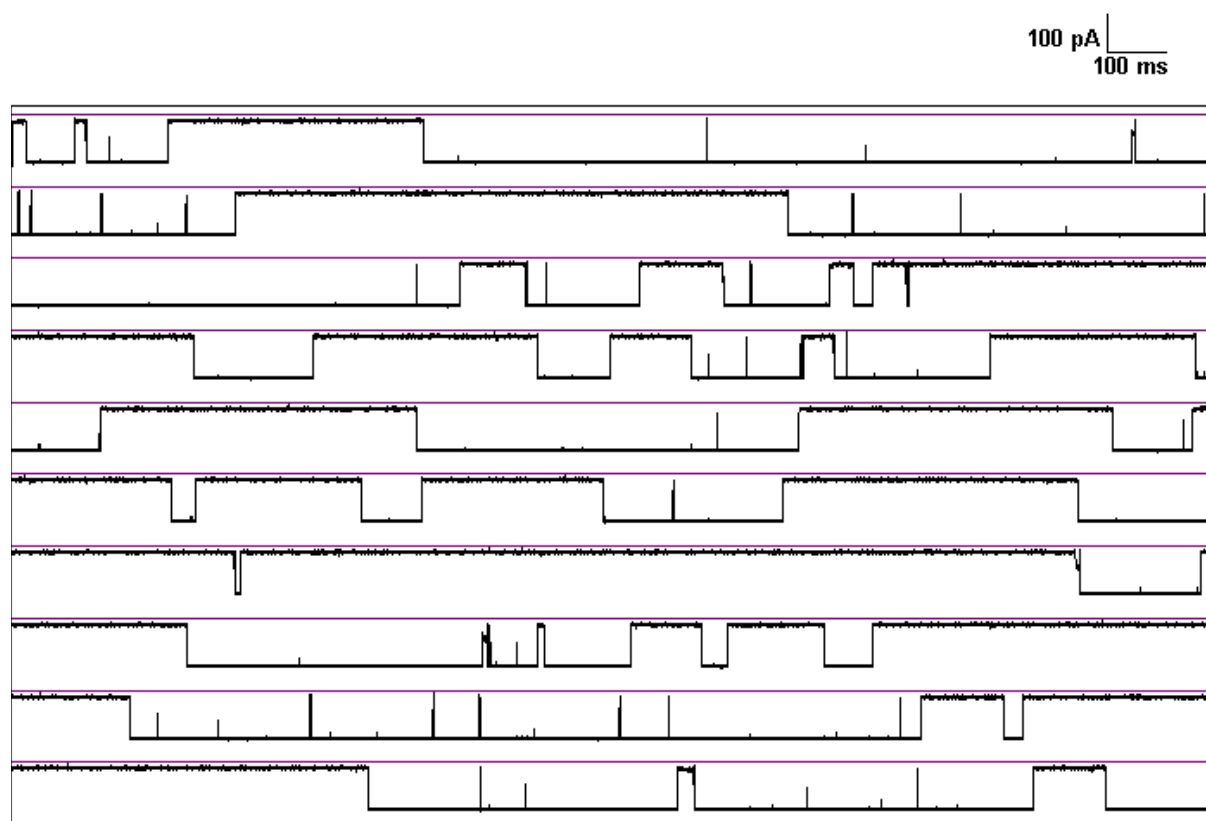

**Figure S11.** A sample  $i-t$  trace showing uninterrupted data collected at 10 kHz for 20 s at 120 mV. The mixture contained 8  $\mu\text{M}$  B-form duplex in 1 M KCl, 10 mM PBS, pH 7.4 at 20  $^{\circ}\text{C}$ .

## 2. Sample *i-t* trace of a mixture containing A-form duplex.

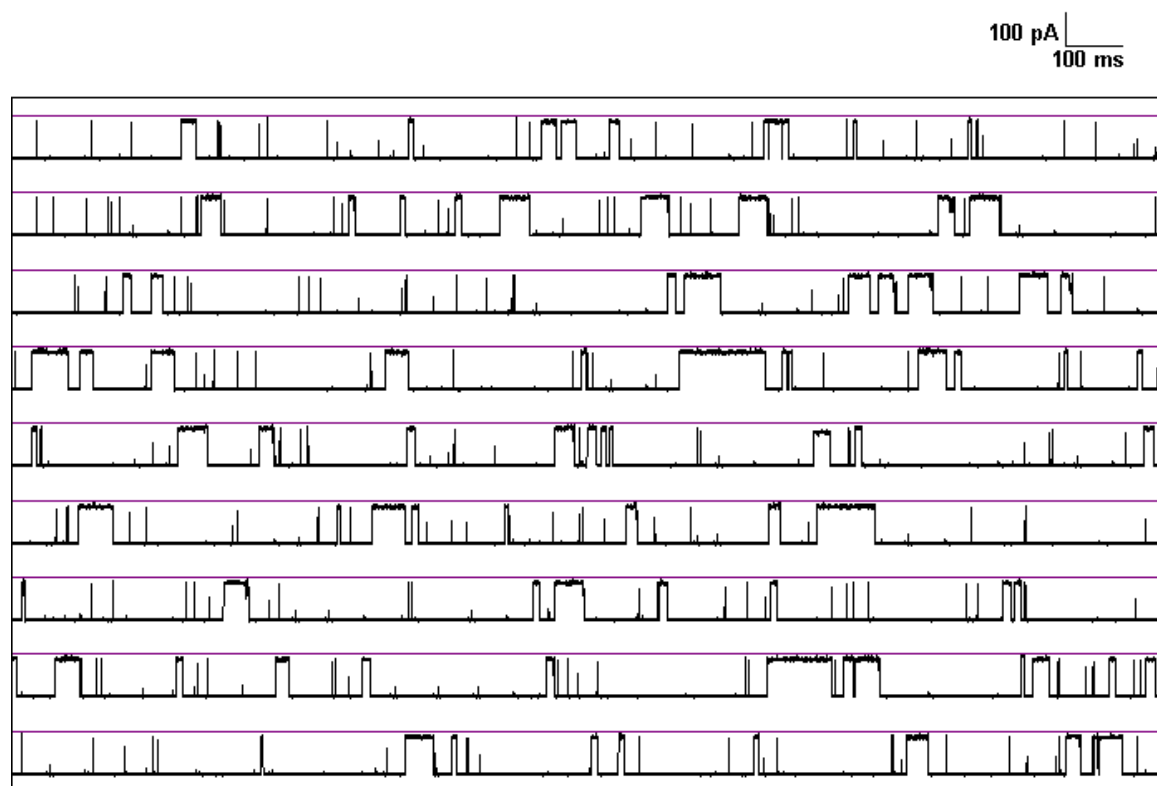

**Figure S12.** A sample *i-t* trace showing uninterrupted data collected at 10 kHz for 20 s at 120 mV. The mixture contained 8  $\mu$ M A-form duplex in 1 M KCl, 10 mM PBS, pH 7.4 at 20  $^{\circ}$ C.

### 3. Sample *i-t* trace of a mixture containing both A- and B-form.

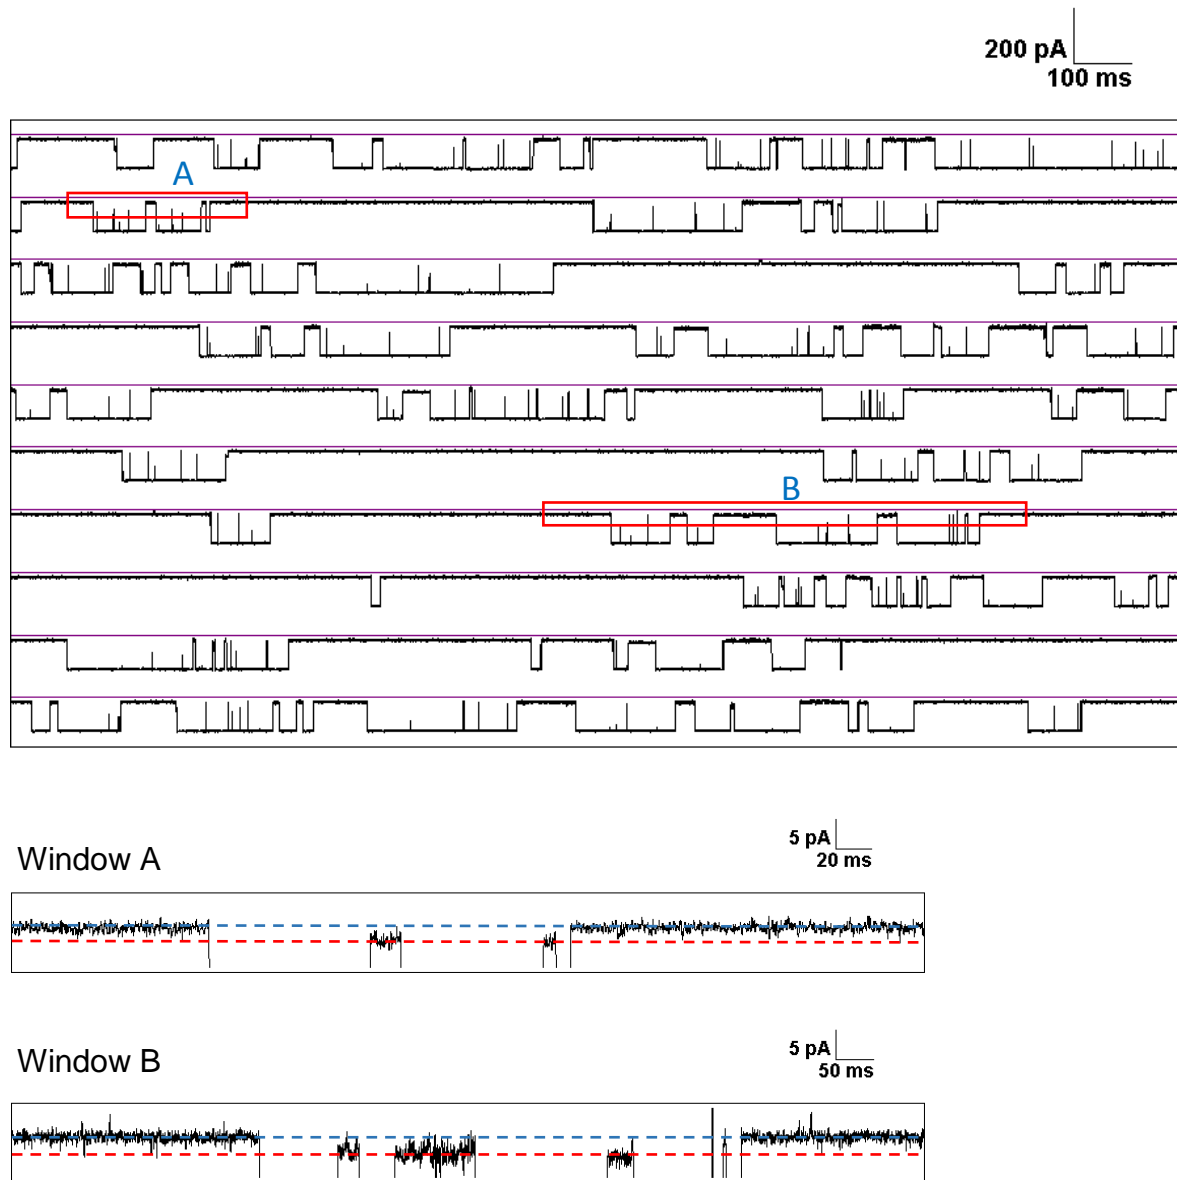

**Figure S13.** A sample *i-t* trace showing uninterrupted data collected at 10 kHz for 20 s at 120 mV. The mixture contained 8  $\mu\text{M}$  A- and B-form duplexes in 1 M KCl, 10 mM PBS, pH 7.4 at 20  $^{\circ}\text{C}$ . The two expanded windows, A and B, show the deep block current differences between A- and B-form duplexes. The expanded area is filtered to 1 kHz for presentation purpose.

#### 4. Voltage dependence of unzipping times for DNA-RNA and DNA-DNA duplexes

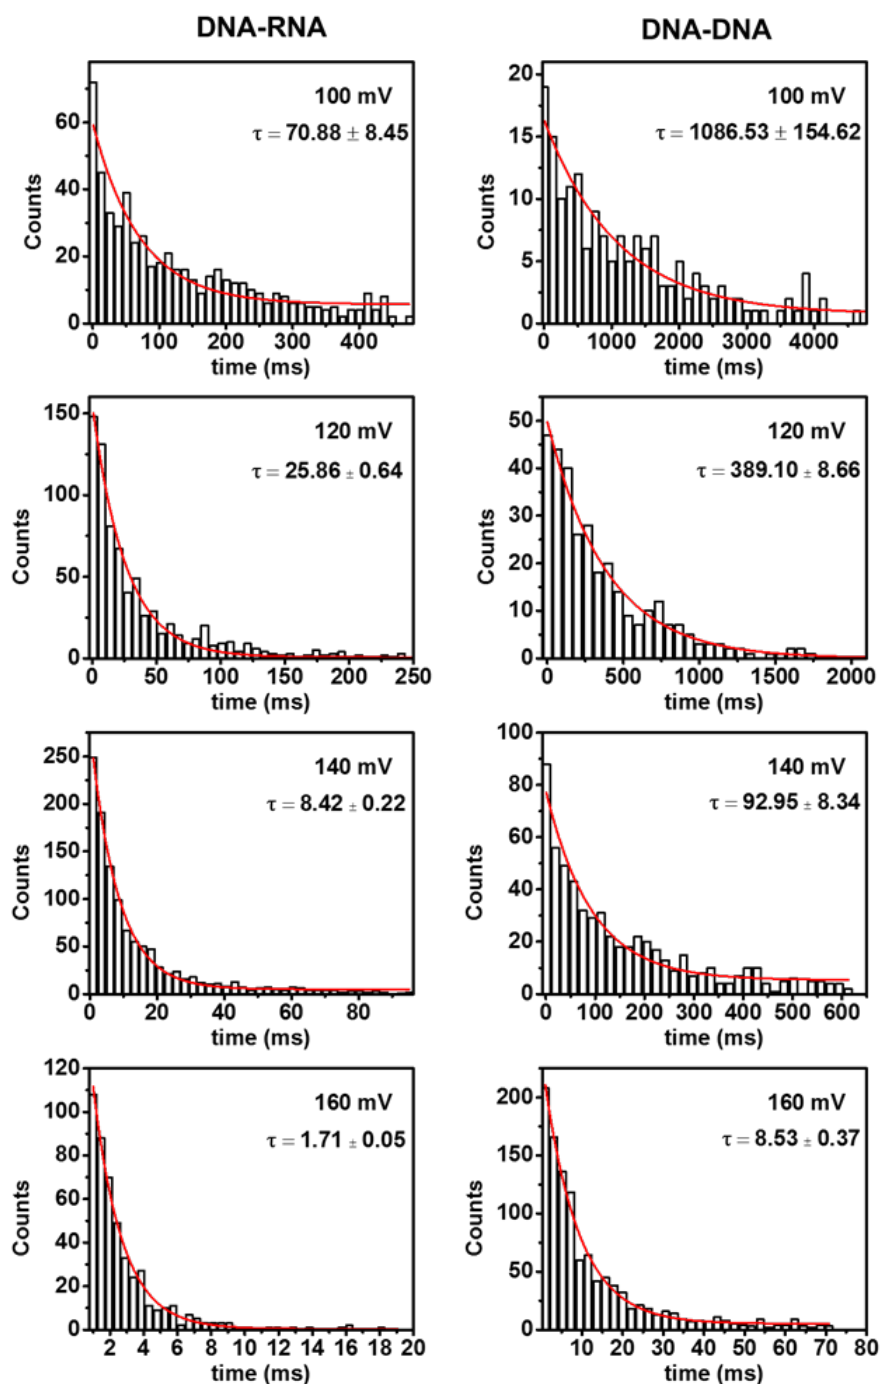

**Figure S14.** Unzipping duration histograms as a function of voltage for DNA-RNA (left) and DNA-DNA (right) duplexes. The data were recorded at 20 °C in 1 M KCl, 10 mM PBS, pH 7.4. An exponential decay was fit to the data to obtain the unzipping time.

## 5. Unzipping of DNA-RNA duplex with 40-nt overhang.

Sequence of DNA-RNA duplex with 40-nt overhang.

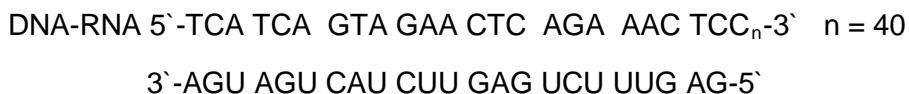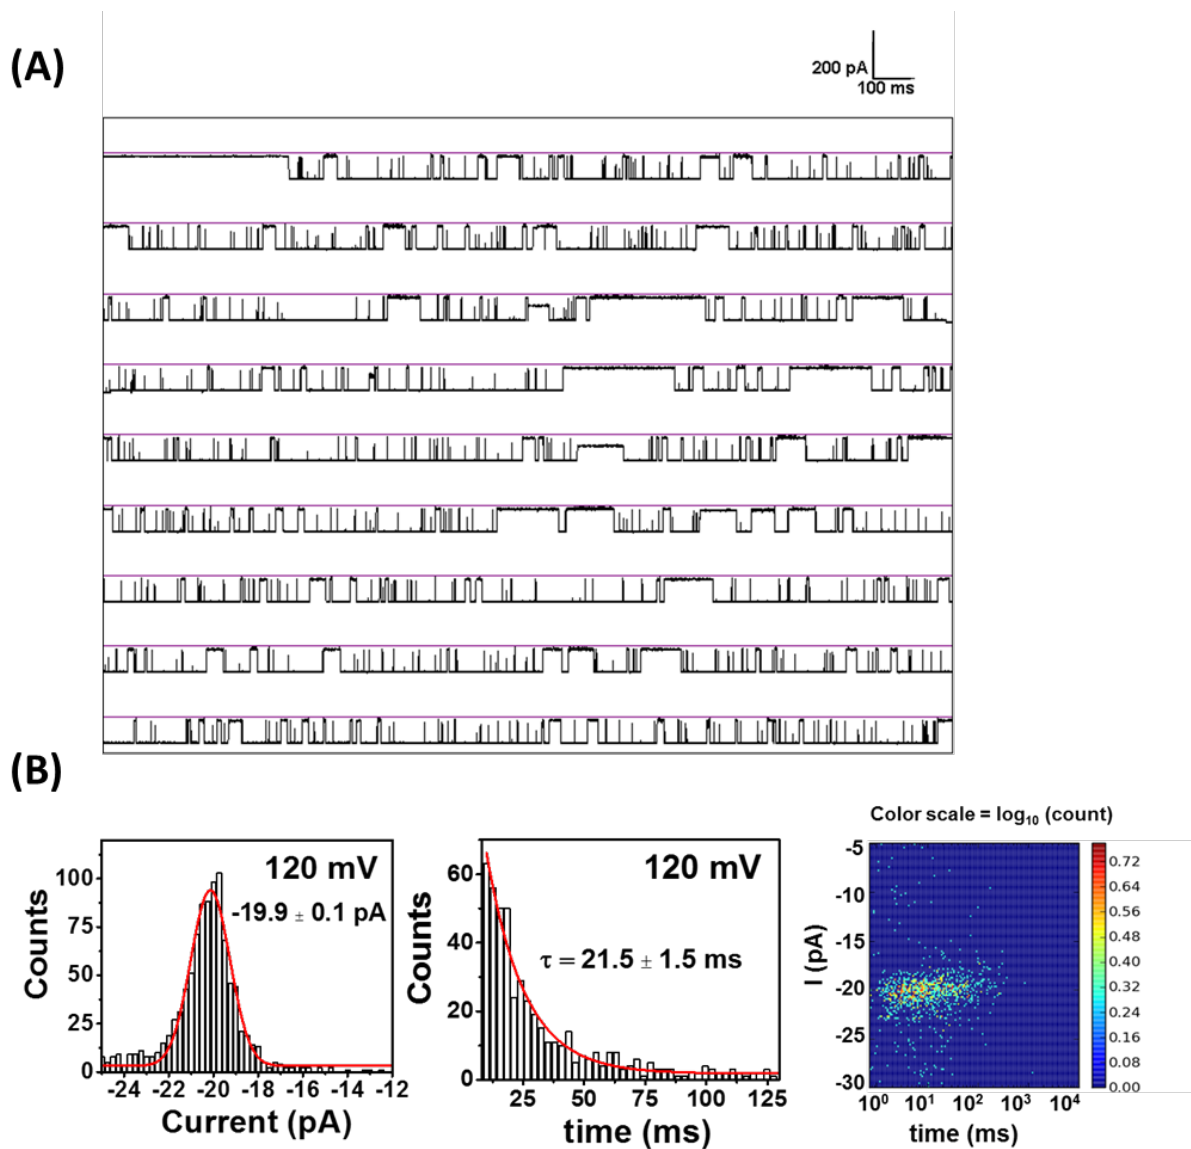

**Figure SI5.** (A) A sample  $i$ - $t$  trace showing uninterrupted data collected at 10 kHz for 20 s at 120 mV. The mixture contained 10  $\mu\text{M}$  DNA-RNA duplex with 40-nt overhang in 1 M KCl, 10 mM PBS, pH 7.4 at 20  $^{\circ}\text{C}$ . (B) Current blockage, unzipping time duration, and  $i$ - $t$  density plots for DNA-RNA duplex with 40-nt overhang.

## 6. Thermal melting analysis of A-and B-form duplexes.

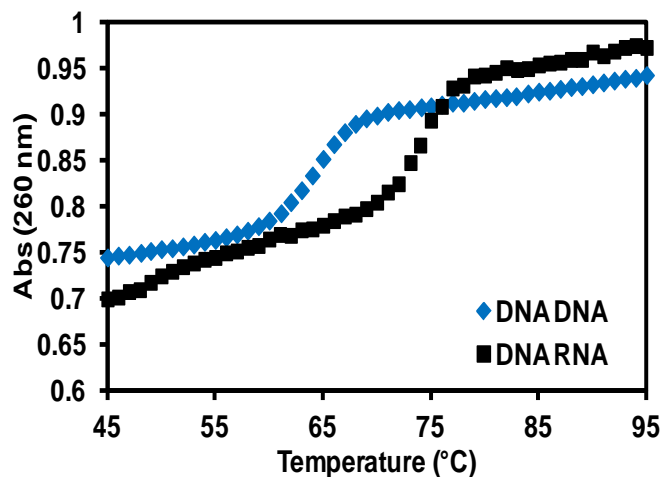

| Sequences                                                                                             |
|-------------------------------------------------------------------------------------------------------|
| <b>DNA-DNA Duplex</b><br>5'-TCA TCA GTA GAA CTC AGA AAC TC-3'<br>3'-AGT AGT CAT CTT GAG TCT TTG AG-5' |
| <b>DNA-RNA Duplex</b><br>5'-TCA TCA GTA GAA CTC AGA AAC TC-3'<br>3'-AGU AGU CAU CUU GAG UCU UUG AG-5' |

**Figure SI6.** Thermal melting analysis of the DNA-DNA and DNA-RNA duplexes. All measurements were performed in 10 mM PBS, pH 7.4. The absorbance at 260 nm,  $Abs_{260\text{ nm}}$ , was monitored as the temperature was increased from 20 °C to 100 °C at a ramp rate of 1 °C/min. At each time interval, the temperature was equilibrated for 30 s prior to making each absorbance measurement. Each experiment was conducted in triplicate.

## 7. Continuous *i-t* trace of DNA-RNA duplex with 10-nt overhang at 160 mV.

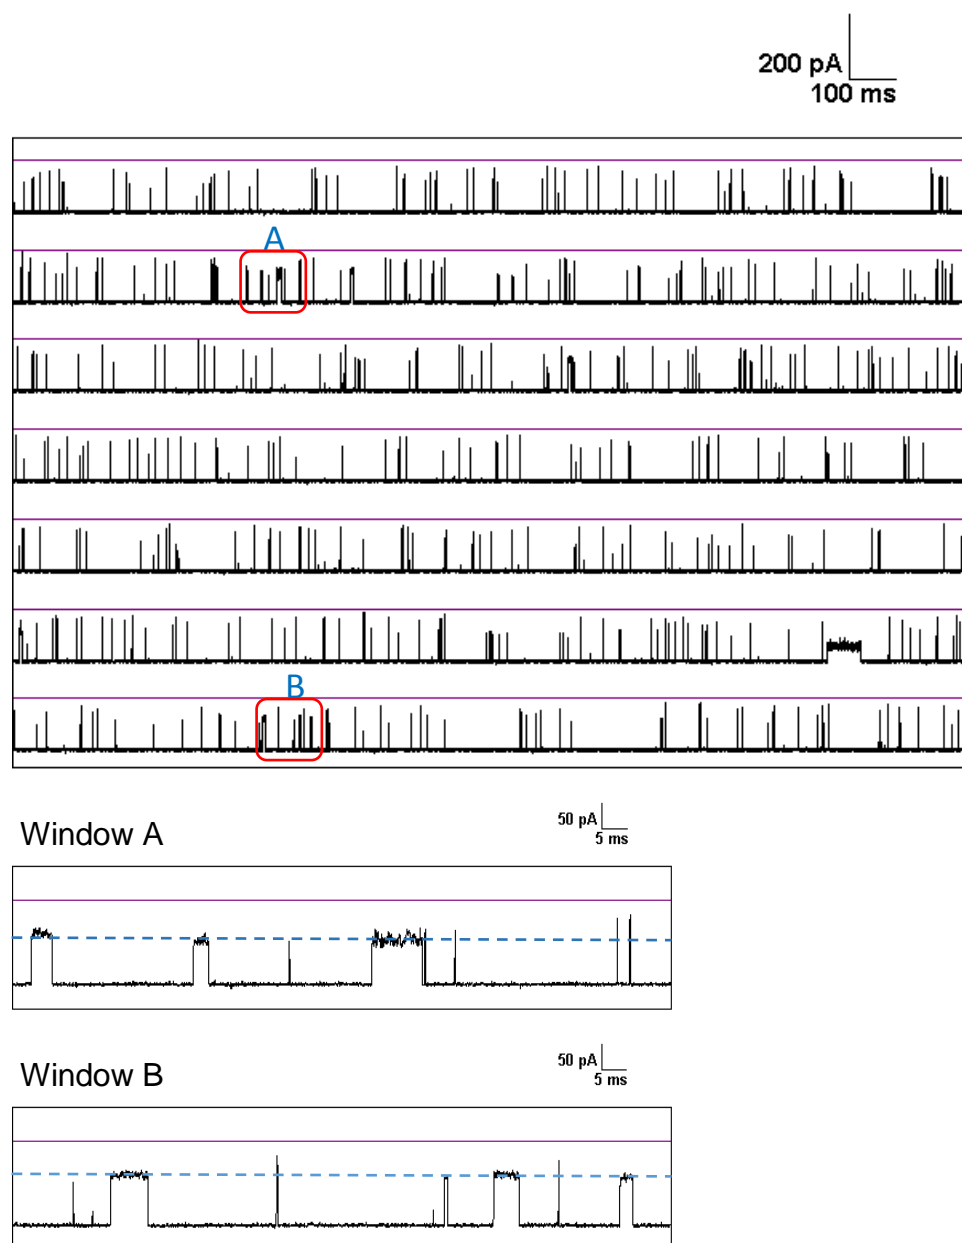

**Figure S17.** A sample *i-t* trace showing uninterrupted data collection at 10 kHz for 20 s at 120 mV. The mixture contained 8  $\mu\text{M}$  of DNA-RNA duplex with 10-nt overhang in 1 M KCl, 10 mM PBS, pH 7.4 at 20  $^{\circ}\text{C}$ . The two expanded windows (A and B) show the blockage due to occupation of the 10-nt overhang in the vestibule.



## 8. Voltage dependent trapping time of the DNA-RNA duplex with 10-nt overhang.

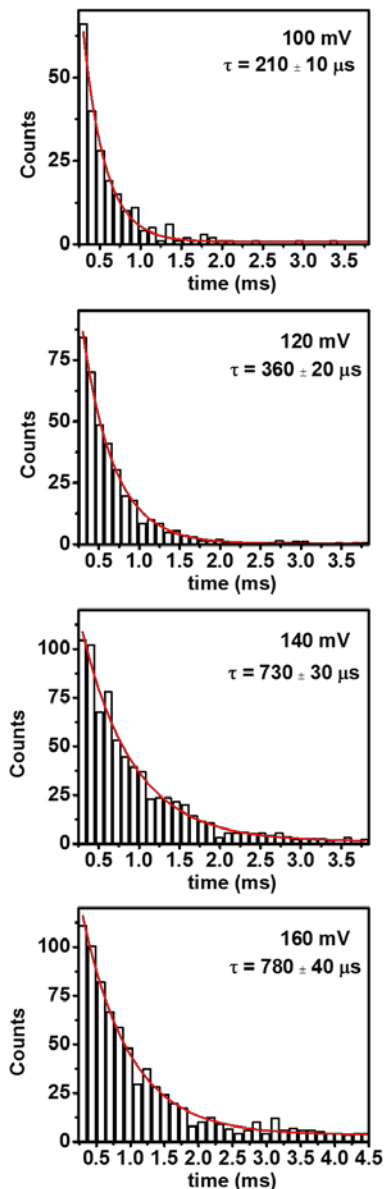

**Figure S18.** Trapping time duration histograms as a function of voltage for DNA-RNA duplex with a 10-nt overhang. Only the events with  $\%I/I_0$  between 20 and 80 and  $\tau > 200 \mu\text{s}$  were analyzed as duplex unzipping events (single strand translocation is much faster). Data were recorded at 20 °C in 1 M KCl, 10 mM PBS, pH 7.4. An exponential decay was fit to the data to obtain the unzipping time.

### 9. Sample *i-t* trace of DNA-DNA duplex with 10-nt overhang at 160 mV.

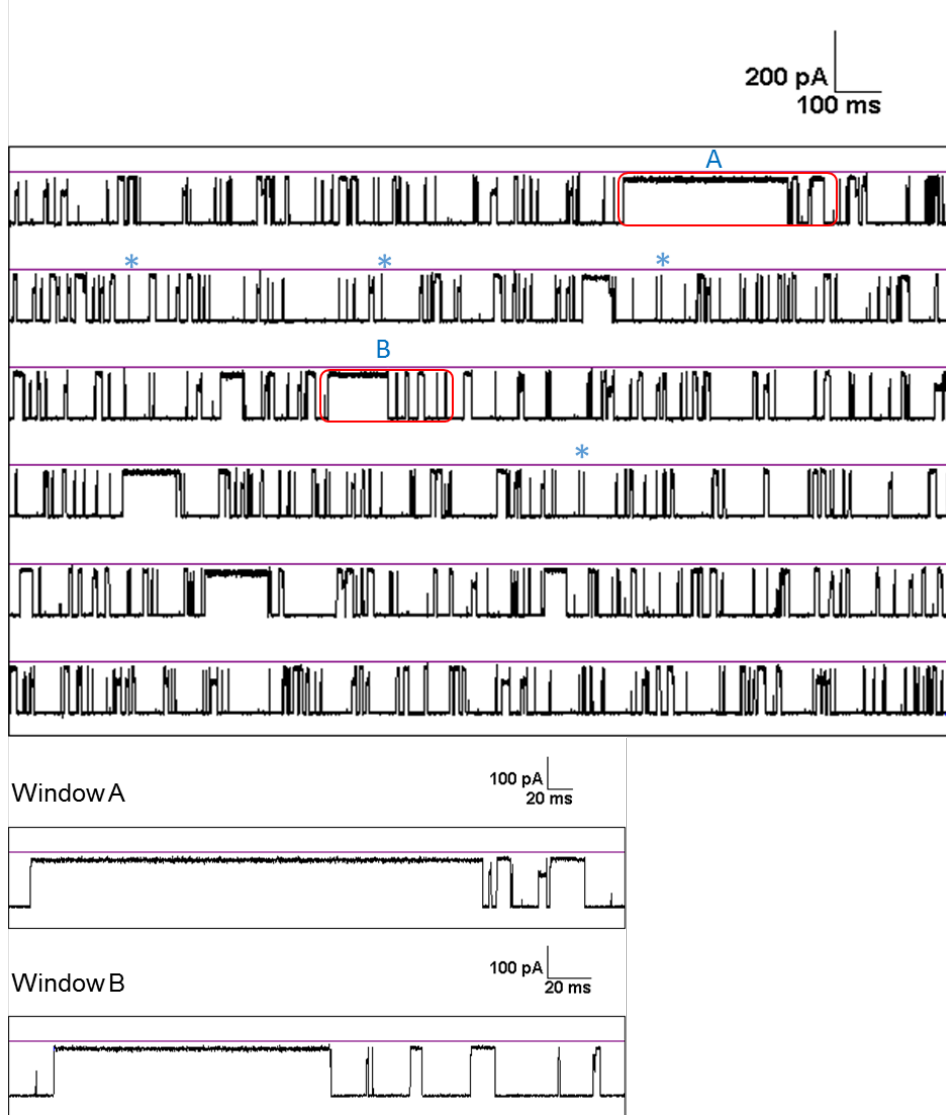

**Figure S19.** A sample *i-t* trace showing uninterrupted data collection at 10 kHz for 20 s at 160 mV. The mixture contained 8  $\mu\text{M}$  of the DNA-DNA duplex with 10-nt overhang in 1 M KCl, 10 mM PBS, pH 7.4 at 20  $^{\circ}\text{C}$ . The two expanded windows (A and B) show long-current blocks are due to unzipping of the duplex and the shorter blocks (less than 1 ms denoted by asterisks) are from translocation of the excess ssDNA.

10. Sample *i-t* trace of DNA-RNA duplex with no overhang.

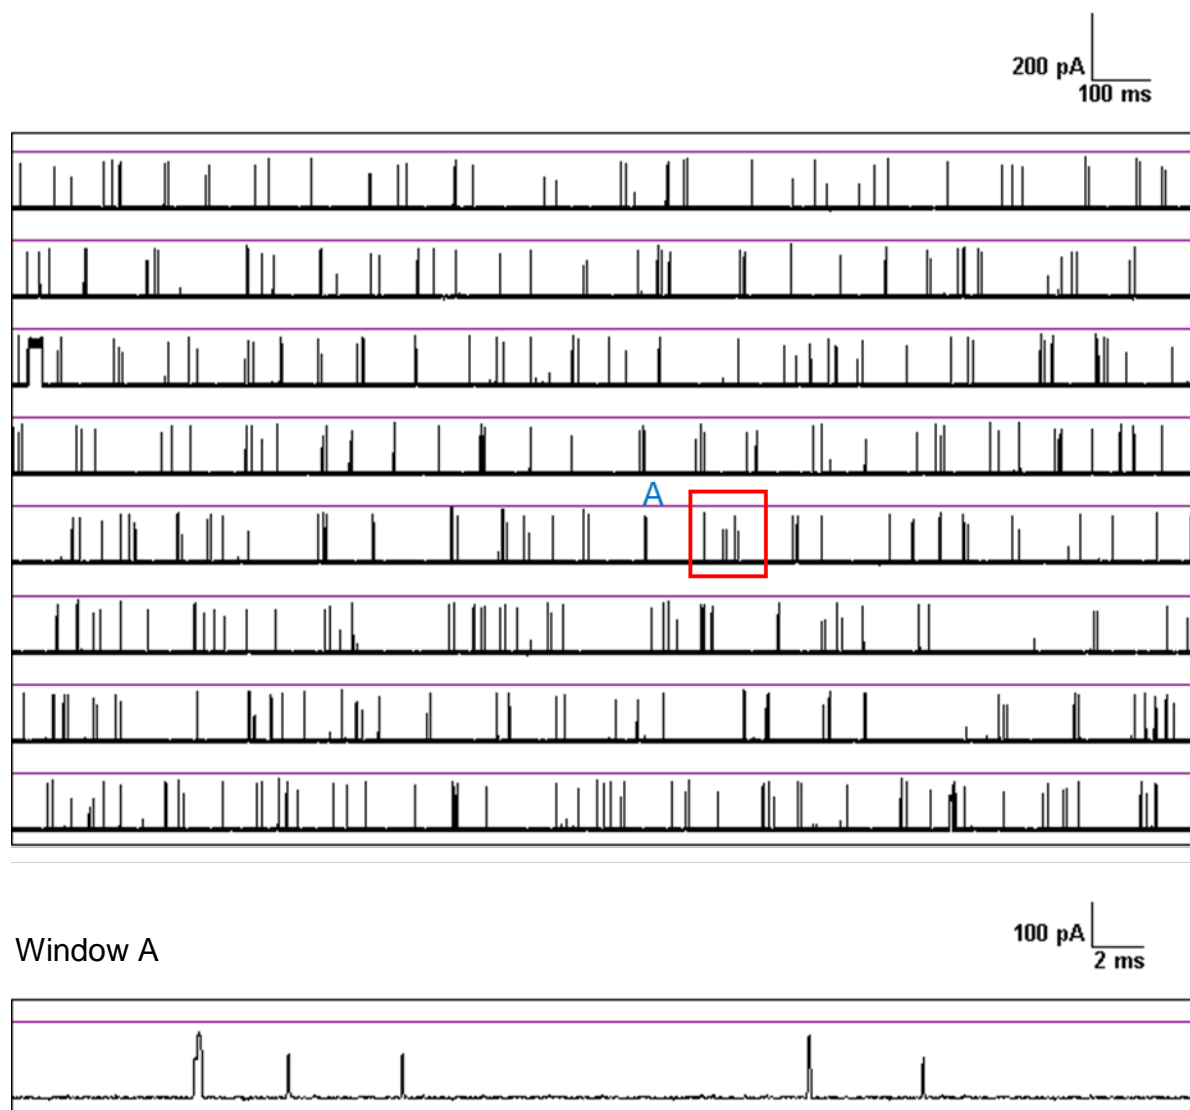

**Figure S110.** A continuous *i-t* trace showing uninterrupted data collection at 10 kHz for 20 s at 160 mV. The mixture contained 8  $\mu$ M DNA-RNA blunt end duplex in 1 M KCl, 10 mM PBS, pH 7.4 at 20 °C. The expanded window A shows short translocation events (less than 500  $\mu$ s) that are due to excess single strands present in the mixture.

## 11. Sample $i$ - $t$ trace of DNA-DNA duplex with no overhang.

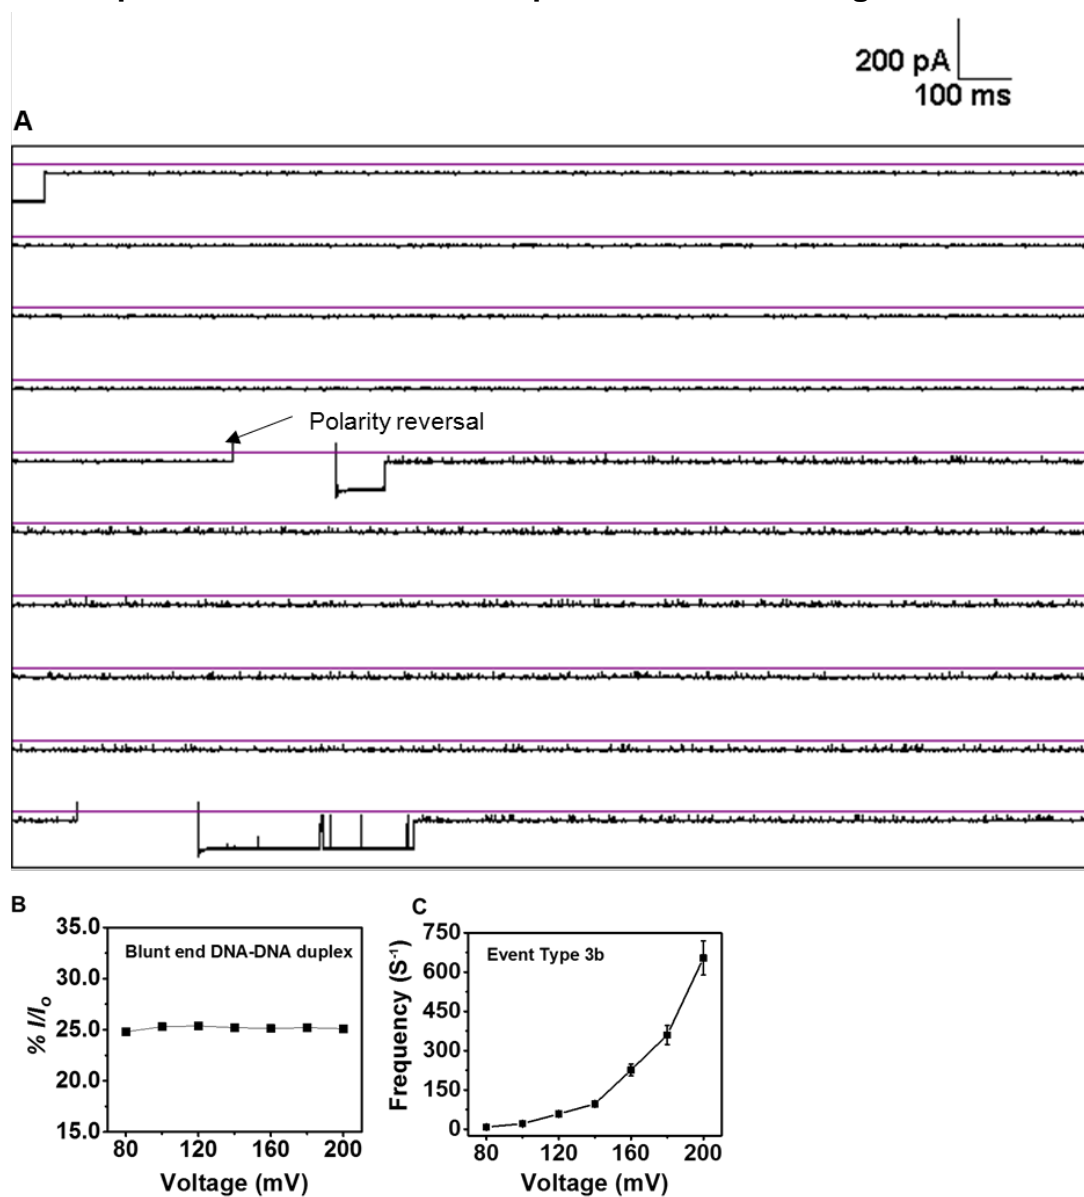

**Figure SI11.** (A) A continuous  $i$ - $t$  trace showing uninterrupted data collection at 10 kHz for 10 s at 120 mV. The *cis* side contained 8  $\mu$ M DNA-DNA blunt end duplex in 1 M KCl, 10 mM PBS, pH 7.4 at 20  $^{\circ}$ C. Long-current blockages show the duplex occupying the vestibule and the short events (less than 1 ms) are due to translocation of excess single strands. Interruption of the current blockage was due to the polarity reversal of the channel to remove the duplex in the nanopore. (B) Residual current when a blunt end duplex is inside the vestibule as a function of voltage. (C) Frequency of the events between two current levels shown in Event Type 3b in the main text Fig. 5B.

## 12. Sample *i-t* trace of DNA-DNA duplex with no overhang at 200 mV.

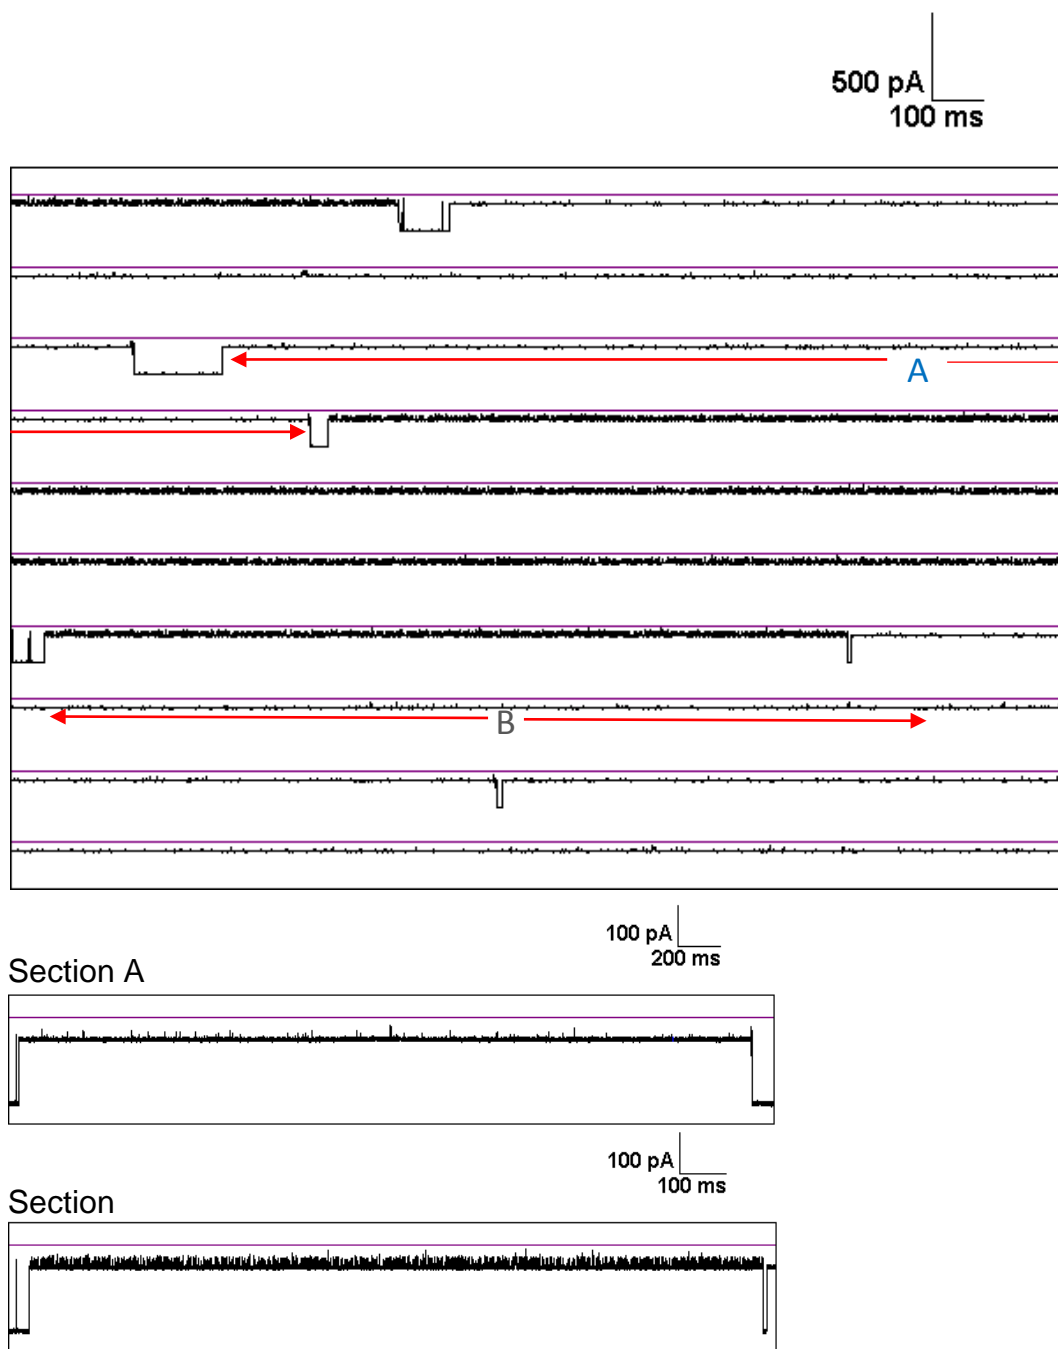

**Figure S112.** A sample *i-t* trace showing uninterrupted data collection at 10 kHz for 20 s at 200 mV. The blunt end duplex unzips at 200 mV but not at 120 mV (see preceding section). The mixture contained 8  $\mu\text{M}$  of the DNA-DNA duplex with 10-nt overhang in 1 M KCl, 10 mM PBS, pH 7.4 at 20  $^{\circ}\text{C}$ . The two expanded windows (A and B) shows long-current blocks are due to unzipping of the duplex.

### 13. Sample *i-t* trace of a mixture containing DNA-PNA duplex.

Sequence of DNA-PNA duplex

DNA-PNA 5`-N GTA GAT CAC T-Lys -3`

3`-CAT CTA GTG A<sub>24</sub>-5`

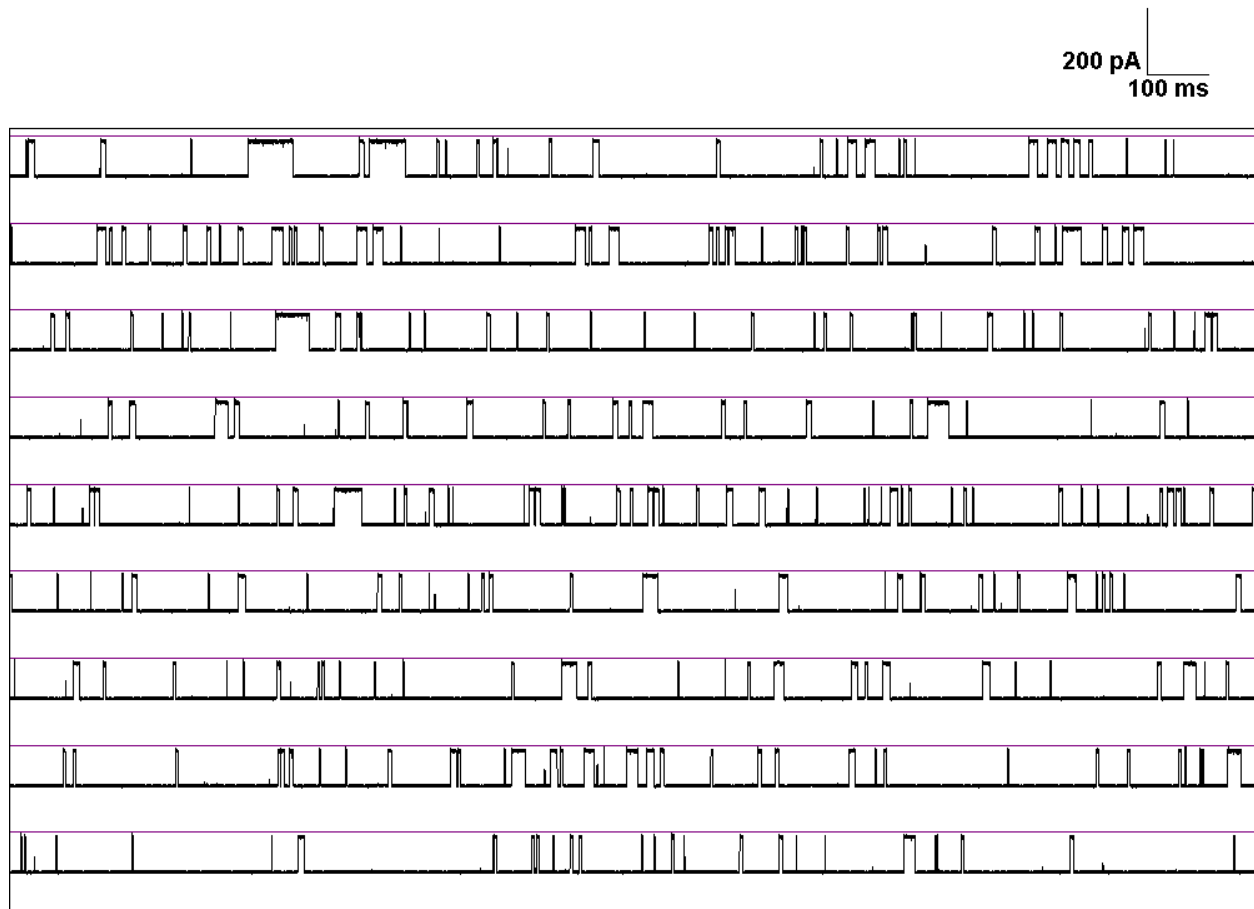

**Figure S113.** A sample *i-t* trace showing uninterrupted data collected at 10 kHz for 20 s at 120 mV. The mixture contained 8  $\mu$ M DNA-PNA duplex in 1 M KCl, 10 mM PBS, pH 7.4 at 20  $^{\circ}$ C.

#### 14. Unzipping time and voltage dependent unzipping for DNA-PNA duplexes.

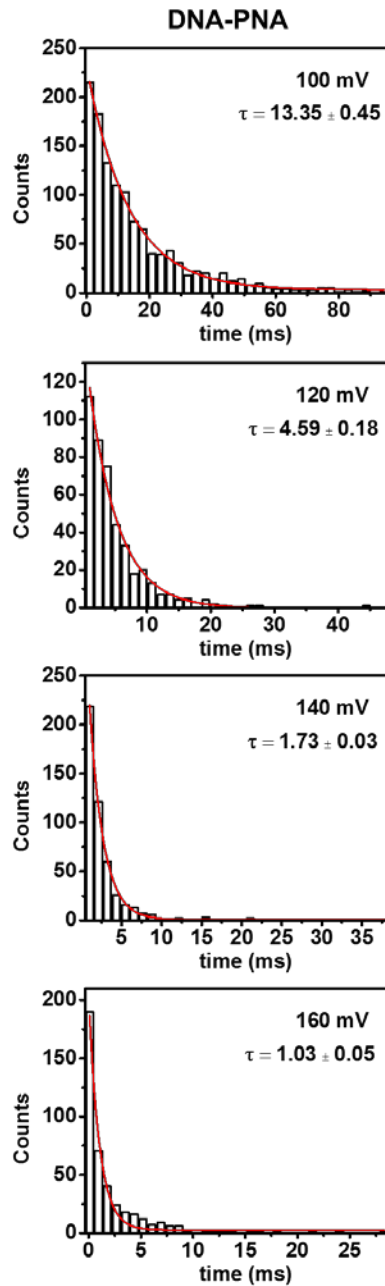

**Figure SI14.** Unzipping duration histograms as a function of voltage for the DNA-PNA duplexes. Data were recorded at 20 °C in 1 M KCl, 10 mM PBS, pH 7.4. An exponential decay was fit to the data to obtain the unzipping time. The *cis* side of the protein channel contained 8  $\mu$ M of DNA-PNA sample.

**15. Comparison of unzipping times of DNA-RNA duplexes with 3' and 5' overhangs.**

In order to investigate if the orientation of the overhang influences the unzipping mechanism, we performed unzipping experiments using 5'-end poly C (24-nt) to compare with the 3'-end poly C (24-nt). The sequence used is given below.

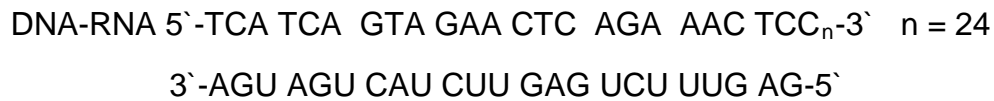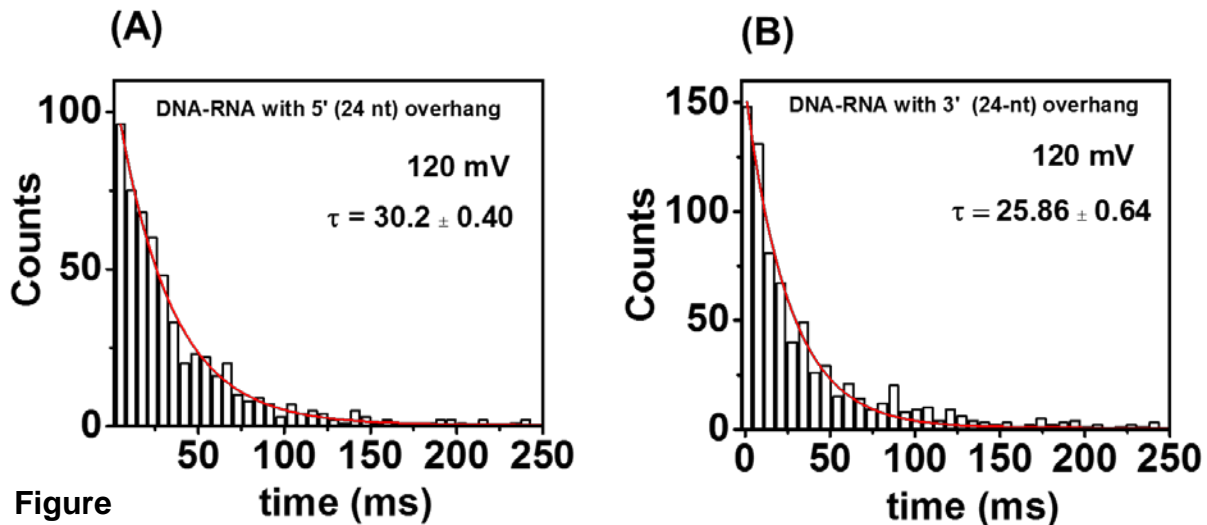

**Figure SI15.** Comparison of the unzipping duration histograms for the DNA-RNA duplexes. (A) 5' poly C overhang. (B) 3' poly C overhang. Data were recorded at 20 °C in 1 M KCl, 10 mM PBS, pH 7.4. An exponential decay was fit to the data to obtain the unzipping times. The *cis* side of the protein channel contained 8  $\mu$ M of DNA-RNA in each case.
